# Supplementary material
Source: Research Square preprint supplement (doi:10.21203/rs.3.rs-8942283/v1)
Supplement: Supplementary file 1 [file 48ef988dfb6496879a6211db.docx]

Assessment of respiratory and cardiovascular risks from ambient PM2.5 exposure in Ratchaburi, Thailand

Sitthipong Pengjan 1,2, Sebastien Bonnet 1,2, Savitri Garivait 1,2,*

1The Joint Graduate School of Energy and Environment, King Mongkut’s University of Technology Thonburi, Bangkok, Thailand

2Center of Excellence on Energy Technology and Environment, Ministry of Higher Education, Science, Research and Innovation, Bangkok, Thailand

*****Correspondence: savitri.gar@kmutt.ac.th

**Supplementary Material**

| **Table of contents** | | **Page** |
| --- | --- | --- |
| Table S1 | Annual average registered population of Ratchaburi and annual average age with their standard deviations (SD), classified by age groups and gender categories during 2015–2019. | 2 |
| Table S2 | Life expectancy at birth in Ratchaburi and Thailand during 2015–2019. | 2 |
| Table S3 | Statistics of respiraory morbidity in Ratchaburi during 2015–2019. | 3 |
| Table S5 | Comparison of the relationship between respiratory mortality and ambient PM2.5 exposure across age groups (all genders) in this study versus other studies. | 5 |
| Table S6 | Comparison of the relationship between respiratory mortality and ambient PM2.5 exposure by gender category (all age groups) in this study versus other studies. | 6 |
| Table S7 | Association between respiratory morbidity and ambient PM2.5 exposure in Ratchaburi during 2015–2019. | 7 |
| Table S8 | Comparison of the relationship between respiratory morbidity and ambient PM2.5 exposure across age groups (all genders) in this study versus other studies. | 8 |
| Table S9 | Comparison of the relationship between respiratory morbidity and ambient PM2.5 exposure by gender category (all age groups) in this study versus other studies. | 9 |
| Table S10 | Comparison of the relationship between cardiovascular mortality and ambient PM2.5 exposure across age groups (all genders) in this study versus other studies. | 10 |
| Table S11 | Comparison of the relationship between cardiovascular mortality and ambient PM2.5 exposure by gender category (all age groups) in this study versus other studies. | 11 |
| Table S12 | Association between cardiovascular morbidity and ambient PM2.5 exposure in Ratchaburi during 2015–2019. | 12 |
| Table S13 | Comparison of the relationship between cardiovascular morbidity and ambient PM2.5 exposure across age groups (all genders) in this study versus other studies. | 13 |
| Table S14 | Comparison of the relationship between cardiovascular morbidity and ambient PM2.5 exposure by gender category (all age groups) in this study versus other studies. | 14 |
| Fig. S1 | Annual average population pyramid and population density in Ratchaburi in 2015. | 15 |
| Fig. S2 | Annual average population pyramid and population density in Ratchaburi in 2016. | 15 |
| Fig. S3 | Annual average population pyramid and population density in Ratchaburi in 2017. | 15 |
| Fig. S4 | Annual average population pyramid and population density in Ratchaburi in 2018. | 16 |
| Fig. S5 | Proportion of hospital outpatient visits for non-accidental morbidity (ICD-10: A00–R99) by sub-cause in Ratchaburi during 2015–2019. | 16 |
| References |  | 16 |

**Table S1** Annual average registered population of Ratchaburi and annual average age with their standard deviations (SD), classified by age groups and gender categories during 2015–2019.

| **Year** | **Parameter** | **All-age and All-gender** | **Children** | **Adult** | **Elderly** | **Male** | **Female** |
| --- | --- | --- | --- | --- | --- | --- | --- |
| 2015 | Annual average registered population (SD) | 836,433  (501) | 144,373  (710) | 556,039  (797) | 136,013  (858) | 405,719  (286) | 430,714  (322) |
| Annual average age (SD) | 37.15  (21.31) | 7.18  (4.37) | 36.39  (12.55) | 70.35  (8.43) | 35.80  (20.83) | 38.43  (21.67) |
| Percentage of all-age and all-gender | 100% | 17% | 67% | 16% | 49% | 51% |
| 2016 | Annual average registered population (SD) | 837,937  (876) | 142,483  (321) | 555,285  (417) | 140,163  (1075) | 406,321  (565) | 431,615  (385) |
| Annual average age (SD) | 37.56  (21.39) | 7.22  (4.24) | 36.62  (12.62) | 70.45  (8.43) | 36.19  (20.91) | 38.85  (21.75) |
| Percentage of all-age and all-gender | 100% | 17% | 66% | 17% | 48% | 52% |
| 2017 | Annual average registered population (SD) | 839,862  (412) | 141,004  (599) | 553,542  (622) | 145,313  (1,398) | 407,430  (330) | 432,432  (194) |
| Annual average age (SD) | 37.90  (21.44) | 7.31  (4.25) | 36.79  (12.66) | 70.43  (8.36) | 36.49  (20.95) | 39.22  (21.80) |
| Percentage of all-age and all-gender | 100% | 17% | 66% | 17% | 49% | 51% |
| 2018 | Annual average registered population (SD) | 840,753  (524) | 138,631  (758) | 551,253  (685) | 150,865  (1,526) | 407,848  (437) | 432,905  (186) |
| Annual average age (SD) | 38.31  (21.52) | 7.38  (4.26) | 36.97  (12.69) | 70.43  (8.40) | 36.87  (21.04) | 39.67  (21.88) |
| Percentage of all-age and all-gender | 100% | 16% | 66% | 18% | 49% | 51% |
| 2019 | Annual average registered population (SD) | 840,963  (399) | 135,693  (1,012) | 548,072  (901) | 157,195  (1,794) | 407,600  (360) | 433,363  (180) |
| Annual average age (SD) | 38.73  (21.60) | 7.45  (4.26) | 37.14  (12.73) | 70.43  (8.43) | 37.28  (21.13) | 40.10  (21.95) |
| Percentage of all-age and all-gender | 100% | 16% | 65% | 19% | 48% | 52% |
| Average | Annual average registered population (SD) | 839,189  (569) | 140,437  (713) | 552,838  (703) | 145,910  (1,387) | 406,984  (408) | 432,206  (267) |
| Annual average age (SD) | 37.93  (21.45) | 7.31  (4.26) | 36.78  (12.65) | 70.42  (8.41) | 36.53  (20.97) | 39.25  (21.81) |
| Percentage of all-age and all-gender | 100% | 17% | 66% | 17% | 48% | 52% |

**Table S2** Life expectancy at birth in Ratchaburi and Thailand during 2015–2019.

| **Year** | **Ratchaburi** | | | **Thailand** | | |
| --- | --- | --- | --- | --- | --- | --- |
| **All-gender** | **Male** | **Female** | **All-gender** | **Male** | **Female** |
| 2015 | 78.06 | 74.00 | 82.12 | 75.00 | 71.60 | 78.40 |
| 2016 | 75.66 | 70.90 | 80.42 | 75.20 | 71.80 | 78.60 |
| 2017 | 75.06 | 70.86 | 79.26 | 75.40 | 72.00 | 78.80 |
| 2018 | 75.08 | 70.94 | 79.22 | 75.55 | 72.20 | 78.90 |
| 2019 | 77.32 | 73.15 | 81.49 | 77.05 | 73.00 | 81.10 |
| Average (SD) | 76.24 (1.23) | 71.97 (1.34) | 80.50 (1.17) | 75.64 (0.73) | 72.12 (0.48) | 79.16 (0.99) |

Source: RBPHO (2020 and 2021).

**Table S3** Statistics of respiratory morbidity in Ratchaburi during 2015–2019.

| **Year** | **Parameter** | **All age - all gender** |  | **Age group** | | | **Gender group** | |
| --- | --- | --- | --- | --- | --- | --- | --- | --- |
|  | **Children** | **Adult** | **Elderly** | **Male** | **Female** |
| 2015 | Number of hospital visits | 101,626 |  | 40,886 | 46,025 | 14,715 | 45,808 | 55,818 |
| Percentage number of hospital outpatient visits of all age – all gender (%) | 100 |  | 40.23 | 45.29 | 14.48 | 45.08 | 54.92 |
| Age average (SD) (years) | 29.30 (24.40) |  | 5.65 (3.69) | 36.78 (12.42) | 71.63 (8.45) | 27.41 (25.64) | 30.86 (23.23) |
| Hospital outpatient visits rate (per 1,000 population) | 121.50 |  | 283.20 | 82.77 | 108.19 | 112.91 | 129.59 |
| 2016 | Number of hospital visits | 110,143 |  | 42,646 | 50,960 | 16,537 | 49,768 | 60,375 |
| Percentage number of hospital visits of all age – all gender (%) | 100 |  | 38.72 | 46.27 | 15.01 | 45.18 | 54.82 |
| Age average (SD) (years) | 30.08 (24.43) |  | 5.75 (3.65) | 36.96 (12.40) | 71.59 (8.47) | 28.04 (25.69) | 31.76 (23.20) |
| Hospital outpatient visits rate (per 1,000 population) | 131.45 |  | 299.31 | 91.77 | 117.98 | 122.48 | 139.88 |
| 2017 | Number of hospital visits | 101,406 |  | 35,967 | 48,534 | 16,903 | 45,012 | 56,394 |
| Percentage number of hospital visits of all age – all gender (%) | 100 |  | 35.47 | 47.86 | 16.67 | 44.39 | 55.61 |
| Age average (SD) (years) | 31.91 (24.56) |  | 6.02 (3.71) | 37.31 (12.40) | 71.47 (8.45) | 29.80 (25.86) | 33.58 (23.33) |
| Hospital outpatient visits rate (per 1,000 population) | 120.74 |  | 255.08 | 87.68 | 116.32 | 110.48 | 130.41 |
| 2018 | Number of hospital visits | 79,277 |  | 27,805 | 37,360 | 14,112 | 35,351 | 43,926 |
| Percentage number of hospital visits of all age – all gender (%) | 100 |  | 35.07 | 47.13 | 17.80 | 44.59 | 55.41 |
| Age average (SD) (years) | 32.50 (24.91) |  | 6.05 (3.76) | 37.42 (12.50) | 71.60 (8.55) | 30.49 (26.28) | 34.12 (23.62) |
| Hospital outpatient visits rate (per 1,000 population) | 94.29 |  | 200.57 | 67.77 | 93.54 | 86.68 | 101.47 |
| 2019 | Number of hospital visits | 84,287 |  | 27,283 | 41,599 | 15,403 | 37,150 | 47,137 |
| Percentage number of hospital visits of all age – all gender (%) | 100 |  | 32.37 | 49.35 | 18.28 | 44.08 | 55.92 |
| Age average (SD) (years) | 33.55 (24.52) |  | 6.64 (3.80) | 37.14 (12.61) | 71.51 (8.65) | 31.84 (25.95) | 34.90 (23.24) |
| Hospital outpatient visits rate (per 1,000 population) | 100.23 |  | 201.06 | 75.90 | 97.99 | 91.14 | 108.77 |

**Table S4** Statistics of cardiovascular morbidity in Ratchaburi during 2015–2019.

| **Year** | **Parameter** | **All age - all gender** | **Age group** | | | **Gender group** | |
| --- | --- | --- | --- | --- | --- | --- | --- |
| **Children** | **Adult** | **Elderly** | **Male** | **Female** |
| 2015 | Number of hospital visits | 88,790 | 158 | 35,188 | 53,444 | 34,947 | 53,843 |
| Percentage number of hospital visits of all age – all gender (%) | 100 | 0.18 | 39.63 | 60.19 | 39.36 | 60.64 |
| Age average (SD) (years) | 63.04 (13.84) | 6.99 (3.77) | 49.74 (8.02) | 71.97 (8.38) | 62.65 (13.87) | 63.29 (13.81) |
| Hospital outpatient visits rate (per 1,000 population) | 106.15 | 1.09 | 63.28 | 392.93 | 86.14 | 125.01 |
| 2016 | Number of hospital visits | 105,771 | 151 | 41,283 | 64,337 | 41,087 | 64,684 |
| Percentage number of hospital visits of all age – all gender (%) | 100 | 0.14 | 39.03 | 60.83 | 38.85 | 61.15 |
| Age average (SD) (years) | 63.18 (13.84) | 8.01 (3.76) | 49.68 (8.12) | 71.97 (8.44) | 62.68 (13.80) | 63.49 (13.86) |
| Hospital outpatient visits rate (per 1,000 population) | 126.23 | 1.06 | 74.35 | 459.02 | 101.12 | 149.86 |
| 2017 | Number of hospital visits | 115,876 | 161 | 43,902 | 71,813 | 45,255 | 70,621 |
| Percentage number of hospital visits of all age – all gender (%) | 100 | 0.14 | 37.89 | 61.97 | 39.05 | 60.95 |
| Age average (SD) (years) | 63.46 (13.84) | 8.63 (3.68) | 49.65 (8.12) | 72.02 (8.50) | 62.89 (13.84) | 63.82 (13.83) |
| Hospital outpatient visits rate (per 1,000 population) | 137.97 | 1.14 | 79.31 | 494.20 | 111.07 | 163.31 |
| 2018 | Number of hospital visits | 102,862 | 140 | 37,747 | 64,975 | 40,535 | 62,327 |
| Percentage number of hospital visits of all age – all gender (%) | 100 | 0.14 | 36.69 | 63.17 | 39.41 | 60.59 |
| Age average (SD) (years) | 63.86 (13.67) | 9.44 (3.67) | 49.92 (7.92) | 72.07 (8.53) | 63.26 (13.60) | 64.24 (13.71) |
| Hospital outpatient visits rate (per 1,000 population) | 122.35 | 1.01 | 68.47 | 430.68 | 99.39 | 143.97 |
| 2019 | Number of hospital visits | 111,657 | 171 | 39,320 | 72,166 | 44,101 | 67,556 |
| Percentage number of hospital visits of all age – all gender (%) | 100 | 0.15 | 35.22 | 64.63 | 39.50 | 60.50 |
| Age average (SD) (years) | 64.17 (13.59) | 10.14 (3.16) | 49.96 (7.83) | 72.04 (8.57) | 63.48 (13.61) | 64.62 (13.56) |
| Hospital outpatient visits rate (per 1,000 population) | 132.77 | 1.26 | 71.74 | 459.09 | 108.20 | 155.89 |

**Table S5** Comparison of the relationship between respiratory mortality and ambient PM2.5 exposure across age groups (all genders) in this study versus other studies.

| **Ref.** | **City, Country** | **Duration** | **Age** | **Gender** | **Form** | **Highest lag** | **β** | **Std E** |
| --- | --- | --- | --- | --- | --- | --- | --- | --- |
| *Pengjan et al. (2026)* | *Ratchaburi, Thailand* | *2015 - 2019* | *Adult (15-59y)* | *All* | *Log-linear* | *lag7* | *0.00160* | *0.00214* |
| *Pengjan et al. (2026)* | *Ratchaburi, Thailand* | *2015 - 2019* | *Elderly (≥60y)* | *All* | *Log-linear* | *lag0* | *0.00366** | *0.00180* |
| Li et al. (2018) | Ningbo, China | 2014 - 2015 | <65 | All | Log-linear | lag4 | -0.00078 | 0.00501 |
|  | Ningbo, China | 2014 - 2015 | ≥65y | All | Log-linear | lag4 | 0.00064 | 0.17917 |
| Liu et al. (2021) | 4 Cities, China | 2014 - 2017 | 0-74y | All | Log-linear | lag0-3 | 0.00019 | 0.00036 |
|  | 4 Cities, China | 2014 - 2017 | ≥75y | All | Log-linear | lag0-3 | 0.00060* | 0.00024 |
|  | 4 cities, China: Urban areas | 2014 - 2017 | 0-74y | All | Log-linear | lag0-3 | -0.00007 | 0.00051 |
|  | 4 cities, China: Urban areas | 2014 - 2017 | ≥75y | All | Log-linear | lag0-3 | 0.00058 | 0.00030 |
|  | 4 cities, China: Rural areas | 2014 - 2017 | 0-74y | All | Log-linear | lag0-3 | 0.00040 | 0.00052 |
|  | 4 cities, China: Rural areas | 2014 - 2017 | ≥75y | All | Log-linear | lag0-3 | 0.00046 | 0.00039 |
| Note: *β is significant at *p*-value < 0.05. | | | | | | | | |

**Table S6** Comparison of the relationship between respiratory mortality and ambient PM2.5 exposure by gender category (all age groups) in this study versus other studies.

| **Ref.** | **City, Country** | **Duration** | **Age** | **Gender** | **Form** | **Highest lag** | **β** | **Std E** |
| --- | --- | --- | --- | --- | --- | --- | --- | --- |
| *Pengjan et al. (2026)* | *Ratchaburi, Thailand* | *2015 - 2019* | *All* | *Male* | *Log-linear* | *lag6* | *0.00107* | *0.00146* |
| *Pengjan et al. (2026)* | *Ratchaburi, Thailand* | *2015 - 2019* | *All* | *Female* | *Log-linear* | *lag0* | *0.00272* | *0.00190* |
| Li et al. (2018) | Ningbo, China | 2014 - 2015 | All | Male | Log-linear | lag4 | -0.00230 | 0.00461 |
|  | Ningbo, China | 2014 - 2015 | All | Female | Log-linear | lag4 | 0.00076 | 0.00284 |
| Liu et al. (2021) | 4 Cities, China | 2014 - 2017 | All | Male | Log-linear | lag0-3 | 0.00066* | 0.00024 |
|  | 4 Cities, China | 2014 - 2017 | All | Female | Log-linear | lag0-3 | 0.00039 | 0.00029 |
|  | 4 cities, China: Urban areas | 2014 - 2017 | All | Male | Log-linear | lag0-3 | 0.00072* | 0.00028 |
|  | 4 cities, China: Urban areas | 2014 - 2017 | All | Female | Log-linear | lag0-3 | 0.00009 | 0.00039 |
|  | 4 cities, China: Rural areas | 2014 - 2017 | All | Male | Log-linear | lag0-3 | 0.00033 | 0.00037 |
|  | 4 cities, China: Rural areas | 2014 - 2017 | All | Female | Log-linear | lag0-3 | 0.00091* | 0.00045 |
| Shin et al. (2022) | 24 cities, Canada | 2001 - 2012 | ≥1y | Male | Log-linear | lag0 | 0.00198 | 0.00180 |
|  | 24 cities, Canada | 2001 - 2012 | ≥1y | Female | Log-linear | lag2 | 0.00109 | 0.00121 |
|  | 24 cities, Canada: Warm season | 2001 - 2012 | ≥1y | Male | Log-linear | lag1 | 0.00129 | 0.00202 |
|  | 24 cities, Canada: Warm season | 2001 - 2012 | ≥1y | Female | Log-linear | lag1 | 0.00000 | 0.00256 |
|  | 24 cities, Canada: Cold season | 2001 - 2012 | ≥1y | Male | Log-linear | lag2 | 0.00188 | 0.00227 |
|  | 24 cities, Canada: Cold season | 2001 - 2012 | ≥1y | Female | Log-linear | lag1 | 0.00237 | 0.00234 |
| Note: *β is significant at *p*-value < 0.05. | | | | | | | | |

**Table S7** Association between respiratory morbidity and ambient PM2.5 exposure in Ratchaburi during 2015–2019.

| **Lag** | **Parameter** | **All-age and  All-gender** | **Age group** | | | **Gender group** | |
| --- | --- | --- | --- | --- | --- | --- | --- |
| **Children** | **Adult** | **Elderly** | **Male** | **Female** |
| 0 | β | 0.00104* | 0.00099 | 0.00110* | 0.00101 | 0.00098 | 0.00110* |
| SE | 0.00052 | 0.00064 | 0.00055 | 0.00072 | 0.00055 | 0.00055 |
| -value | 0.04526 | 0.12171 | 0.04537 | 0.15761 | 0.07623 | 0.04537 |
| 1 | β | 0.00066 | 0.00073 | 0.00067 | 0.00051 | 0.00041 | 0.00086* |
| SE | 0.00041 | 0.00050 | 0.00043 | 0.00057 | 0.00043 | 0.00043 |
| -value | 0.10674 | 0.14522 | 0.12333 | 0.37513 | 0.34904 | 0.04734 |
| 2 | β | 0.00020 | 0.00018 | 0.00020 | 0.00020 | 0.00010 | 0.00028 |
| SE | 0.00027 | 0.00034 | 0.00030 | 0.00038 | 0.00029 | 0.00029 |
| -value | 0.47680 | 0.60772 | 0.50892 | 0.61568 | 0.74610 | 0.34460 |
| 3 | β | -0.00003 | -0.00015 | -0.00002 | 0.00011 | 0.00003 | -0.00009 |
| SE | 0.00029 | 0.00034 | 0.00030 | 0.00040 | 0.00030 | 0.00030 |
| -value | 0.92325 | 0.67646 | 0.95174 | 0.79576 | 0.92718 | 0.77957 |
| 4 | β | 0.00005 | -0.00008 | 0.00008 | 0.00019 | 0.00014 | -0.00003 |
| SE | 0.00028 | 0.00034 | 0.00030 | 0.00039 | 0.00030 | 0.00030 |
| -value | 0.86849 | 0.82655 | 0.80077 | 0.64110 | 0.65166 | 0.92657 |
| 5 | β | 0.00032 | 0.00026 | 0.00037 | 0.00031 | 0.00028 | 0.00034 |
| SE | 0.00027 | 0.00033 | 0.00029 | 0.00038 | 0.00029 | 0.00029 |
| -value | 0.24284 | 0.44078 | 0.19989 | 0.41856 | 0.33586 | 0.23982 |
| 6 | β | 0.00043 | 0.00045 | 0.00049 | 0.00029 | 0.00025 | 0.00057 |
| SE | 0.00041 | 0.00050 | 0.00043 | 0.00056 | 0.00043 | 0.00043 |
| -value | 0.29812 | 0.37586 | 0.26319 | 0.62060 | 0.57556 | 0.19130 |
| 7 | β | -0.00017 | -0.00026 | -0.00013 | -0.00014 | -0.00023 | -0.00012 |
| SE | 0.00051 | 0.00063 | 0.00054 | 0.00071 | 0.00054 | 0.00054 |
| -value | 0.75339 | 0.69221 | 0.82266 | 0.85470 | 0.68556 | 0.83651 |
| 0-1 | β | 0.00171* | 0.00172* | 0.00177* | 0.00153* | 0.00138* | 0.00196* |
| SE | 0.00045 | 0.00054 | 0.00047 | 0.00062 | 0.00047 | 0.00047 |
| -value | 0.00015 | 0.00159 | 0.00018 | 0.01297 | 0.00340 | 0.00004 |
| 0-2 | β | 0.00190* | 0.00189* | 0.00197* | 0.00173* | 0.00147* | 0.00223* |
| SE | 0.00046 | 0.00057 | 0.00049 | 0.00064 | 0.00049 | 0.00049 |
| -value | 0.00005 | 0.00087 | 0.00007 | 0.00721 | 0.00292 | 0.00001 |
| 0-3 | β | 0.00187* | 0.00174* | 0.00194* | 0.00184* | 0.00151* | 0.00215* |
| SE | 0.00046 | 0.00056 | 0.00049 | 0.00063 | 0.00049 | 0.00049 |
| -value | 0.00006 | 0.00203 | 0.00008 | 0.00355 | 0.00202 | 0.00001 |
| 0-4 | β | 0.00191* | 0.00167* | 0.00202* | 0.00203* | 0.00166* | 0.00212* |
| SE | 0.00054 | 0.00066 | 0.00056 | 0.00073 | 0.00056 | 0.00056 |
| -value | 0.00039 | 0.01122 | 0.00038 | 0.00547 | 0.00340 | 0.00019 |
| 0-5 | β | 0.00223* | 0.00192* | 0.00240* | 0.00234* | 0.00193* | 0.00246* |
| SE | 0.00054 | 0.00066 | 0.00057 | 0.00074 | 0.00057 | 0.00057 |
| -value | 0.00004 | 0.00381 | 0.00003 | 0.00155 | 0.00075 | 0.00002 |
| 0-6 | β | 0.00265* | 0.00237* | 0.00289* | 0.00263* | 0.00219* | 0.00303* |
| SE | 0.00062 | 0.00076 | 0.00065 | 0.00085 | 0.00066 | 0.00066 |
| -value | 0.00002 | 0.00192 | 0.00001 | 0.00212 | 0.00091 | 0.00000 |
| 0-7 | β | 0.00249* | 0.00211* | 0.00275* | 0.00248* | 0.00195* | 0.00291* |
| SE | 0.00056 | 0.00068 | 0.00059 | 0.00077 | 0.00059 | 0.00059 |
| -value | 0.00001 | 0.00205 | 0.00000 | 0.00131 | 0.00095 | 0.00000 |
| Note: *β is significant at *p*-value < 0.05. | | | | | | | |

**Table S8** Comparison of the relationship between respiratory morbidity and ambient PM2.5 exposure across age groups (all genders) in this study versus other studies.

| **Ref.** | **City, Country** | **Duration** | **Incidence** | **Age** | **Gender** | **Form** | **Highest lag** | **Β** | **Std E** |
| --- | --- | --- | --- | --- | --- | --- | --- | --- | --- |
| *This study* | *Ratchaburi, Thailand* | *2015 - 2019* | *Hospital outpatient visits* | *Children (0-14y)* | *All* | *Log-linear* | *lag0-6* | *0.00237** | *0.00076* |
| *This study* | *Ratchaburi, Thailand* | *2015 - 2019* | *Hospital outpatient visits* | *Adult (15-59y)* | *All* | *Log-linear* | *lag0-6* | *0.00289** | *0.00065* |
| *This study* | *Ratchaburi, Thailand* | *2015 - 2019* | *Hospital outpatient visits* | *Elderly (≥60y)* | *All* | *Log-linear* | *lag0-6* | *0.00263** | *0.00085* |
| Strosnider et al. (2019) | 17 states, United States | 2000 - 2014 | Emergency Department Visits | 0-19y | All | Log-linear | lag0-6 | 0.00237* | 0.00025 |
|  | 17 states, United States | 2000 - 2014 | Emergency Department Visits | 15-65y | All | Log-linear | lag0-6 | 0.00198* | 0.00020 |
|  | 17 states, United States | 2000 - 2014 | Emergency Department Visits | ≥65y | All | Log-linear | lag0-6 | 0.00080 | 0.00028 |
| Gu et al. (2020) | 252 cities, China | 2013 - 2017 | Hospital admission | <65y | All | Log-linear | lag0 | 0.00024* | 0.00003 |
|  | 252 cities, China | 2013 - 2017 | Hospital admission | 65-74y | All | Log-linear | lag0 | 0.00041* | 0.00008 |
|  | 252 cities, China | 2013 - 2017 | Hospital admission | ≥75y | All | Log-linear | lag0 | 0.00048* | 0.00006 |
| Priyankara et al. (2021) | Kandy, Sri Lanka | 2019 | Hospital admission | <65y | All | Log-linear | lag1 | 0.08020 | 0.08778 |
|  | Kandy, Sri Lanka | 2019 | Hospital admission | ≥65y | All | Log-linear | lag0-6 | 0.10080* | 0.07393 |
| Wang et al. (2023) | Wuhan, China | 2017 - 2019 | Hospital admission | <65y | All | Log-linear | lag0-1 | 0.00113* | 0.00025 |
|  | Wuhan, China | 2017 - 2019 | Hospital admission | 65-74y | All | Log-linear | lag0-1 | 0.00135* | 0.00037 |
|  | Wuhan, China | 2017 - 2019 | Hospital admission | ≥75y | All | Log-linear | lag0-1 | 0.00109* | 0.00032 |
| Note: *β is significant at *p*-value < 0.05. | | | | | | | | | |

**Table S9** Comparison of the relationship between respiratory morbidity and ambient PM2.5 exposure by gender category (all age groups) in this study versus other studies.

| **Ref.** | **City, Country** | **Duration** | **Incidence** | **Age** | **Gender** | **Form** | **Highest lag** | **Β** | **Std E** |
| --- | --- | --- | --- | --- | --- | --- | --- | --- | --- |
| *This study* | *Ratchaburi, Thailand* | *2015 - 2019* | *Hospital outpatient visits* | *All* | *Male* | *Log-linear* | *lag6* | *0.00219** | *0.00066* |
| *This study* | *Ratchaburi, Thailand* | *2015 - 2019* | *Hospital outpatient visits* | *All* | *Female* | *Log-linear* | *lag0* | *0.00303** | *0.00066* |
| Gu et al. (2020) | 252 cities, China | 2013 - 2017 | Hospital admission | <65y | All | Log-linear | lag0 | 0.00028* | 0.00003 |
|  | 252 cities, China | 2013 - 2017 | Hospital admission | 65-74y | All | Log-linear | lag0 | 0.00031* | 0.00004 |
| Priyankara et al. (2021) | Kandy, Sri Lanka | 2019 | Hospital admission | All | Male | Log-linear | lag0 | 0.00222* | 0.00109 |
|  | Kandy, Sri Lanka | 2019 | Hospital admission | All | Female | Log-linear | lag0 | 0.00232* | 0.00115 |
| Shin et al. (2022) | 24 cities, Canada | 2001 - 2012 | Hospitalization | ≥1y | Male | Log-linear | lag1 | 0.00070 | 0.00048 |
|  | 24 cities, Canada | 2001 - 2012 | Hospitalization | ≥1y | Female | Log-linear | lag1 | 0.00178* | 0.00040 |
|  | 24 cities, Canada: Warm season | 2001 - 2012 | Hospitalization | ≥1y | Male | Log-linear | lag2 | 0.00080 | 0.00086 |
|  | 24 cities, Canada: Warm season | 2001 - 2012 | Hospitalization | ≥1y | Female | Log-linear | lag1 | 0.00257* | 0.00072 |
|  | 24 cities, Canada: Cold season | 2001 - 2012 | Hospitalization | ≥1y | Male | Log-linear | lag0 | 0.00119 | 0.00076 |
|  | 24 cities, Canada: Cold season | 2001 - 2012 | Hospitalization | ≥1y | Female | Log-linear | lag1 | 0.00119 | 0.00098 |
| Wang et al. (2023) | Wuhan, China | 2017 - 2019 | Hospital admission | All | Male | Log-linear | lag0-1 | 0.00091* | 0.00025 |
|  | Wuhan, China | 2017 - 2019 | Hospital admission | All | Female | Log-linear | lag0-1 | 0.00148* | 0.00027 |
| Note: *β is significant at *p*-value < 0.05. | | | | | | | | | |
|  | | | | | | | | | |

**Table S10** Comparison of the relationship between cardiovascular mortality and ambient PM2.5 exposure across age groups (all genders) in this study versus other studies.

| **Ref.** | **City, Country** | **Duration** | **Age** | **Gender** | **Form** | **Highest lag** | **β** | **Std E** |
| --- | --- | --- | --- | --- | --- | --- | --- | --- |
| *Pengjan et al. (2026)* | *Ratchaburi, Thailand* | *2015 - 2019* | *Adult (15-59y)* | *All* | *Log-linear* | *lag0-5* | *0.00630** | *0.00215* |
| *Pengjan et al. (2026)* | *Ratchaburi, Thailand* | *2015 - 2019* | *Elderly (≥60y)* | *All* | *Log-linear* | *lag4* | *0.00188** | *0.00091* |
| Chen et al. (2018) | 30 cities, China | 2013 - 2015 | 0-64y | All | Log-linear | lag0 | 0.00013 | 0.00017 |
|  | 30 cities, China | 2013 - 2015 | 65-74y | All | Log-linear | lag0 | 0.00029 | 0.00015 |
|  | 30 cities, China | 2013 - 2015 | ≥75y | All | Log-linear | lag0 | 0.00009* | 0.00005 |
| Li et al. (2018) | Ningbo, China | 2014 - 2015 | <65y | All | Log-linear | lag2 | -0.00026 | 0.00337 |
|  | Ningbo, China | 2014 - 2015 | ≥65y | All | Log-linear | lag2 | 0.00126 | 0.00248 |
| Cheng et al. (2019) | Hefei, China | 2013 - 2015 | <74y | All | Log-linear | lag0 | 0.00067 | 0.00039 |
|  | Hefei, China | 2013 - 2015 | ≥75y | All | Log-linear | lag0-1 | 0.00046 | 0.00026 |
| Gong et al. (2019) | Beijing, China | 2006 - 2011 | 0-64y | All | Log-linear | lag0-1 | 0.00028* | 0.00063 |
|  | Beijing, China | 2006 - 2011 | ≥65y | All | Log-linear | lag0-1 | 0.00055* | 0.00034 |
| Liu et al. (2021) | 4 Cities, China | 2014 - 2017 | 0-74y | All | Log-linear | lag0-3 | 0.00024 | 0.00017 |
|  | 4 Cities, China | 2014 - 2017 | ≥75y | All | Log-linear | lag0-3 | 0.00099* | 0.00013 |
|  | 4 cities, China: Urban areas | 2014 - 2017 | 0-74y | All | Log-linear | lag0-3 | 0.00037 | 0.00022 |
|  | 4 cities, China: Urban areas | 2014 - 2017 | ≥75y | All | Log-linear | lag0-3 | 0.00098* | 0.00016 |
|  | 4 cities, China: Rural areas | 2014 - 2017 | 0-74y | All | Log-linear | lag0-3 | 0.00009 | 0.00028 |
|  | 4 cities, China: Rural areas | 2014 - 2017 | ≥75y | All | Log-linear | lag0-3 | 0.00096* | 0.00024 |
| Yap et al. (2019) | Whole country, Singapore | 2001 - 2013 | <65y | All | Log-linear | lag0-5 | -0.00115 | 0.00090 |
|  | Whole country, Singapore | 2001 - 2013 | ≥65y | All | Log-linear | lag0-5 | 0.00147* | 0.00053 |
| Note: *β is significant at *p*-value < 0.05. | | | | | | | | |

**Table S11** Comparison of the relationship between cardiovascular mortality and ambient PM2.5 exposure by gender category (all age groups) in this study versus other studies.

| **Ref.** | **City, Country** | **Duration** | **Age** | **Gender** | **Form** | **Highest lag** | **β** | **Std E** |
| --- | --- | --- | --- | --- | --- | --- | --- | --- |
| *Pengjan et al, (2026)* | *Ratchaburi, Thailand* | *2015 - 2019* | *All* | *Male* | *Log-linear* | *lag03* | *0.00270** | *0.00092* |
| *Pengjan et al. (2026)* | *Ratchaburi, Thailand* | *2015 - 2019* | *All* | *Female* | *Log-linear* | *lag0-7* | *0.00233* | *0.00238* |
| Li et al. (2018) | Ningbo, China | 2014 - 2015 | All | Male | Log-linear | lag2 | 0.00045 | 0.00304 |
|  | Ningbo, China | 2014 - 2015 | All | Female | Log-linear | lag2 | 0.00202* | 0.00246 |
| Chen et al. (2018) | 30 cities, China | 2013 - 2015 | All | Male | Log-linear | lag0 | 0.00016 | 0.00010 |
|  | 30 cities, China | 2013 - 2015 | All | Female | Log-linear | lag0 | 0.00009 | 0.00008 |
| Cheng et al. (2019) | Hefei, China | 2013 - 2015 | All | Male | Log-linear | lag0 | 0.00038 | 0.00029 |
|  | Hefei, China | 2013 - 2015 | All | Female | Log-linear | lag0-5 | 0.00148* | 0.00039 |
| Gong et al. (2019) | Beijing, China | 2006 - 2011 | All | Male | Log-linear | lag0-1 | 0.00062* | 0.00039 |
|  | Beijing, China | 2006 - 2011 | All | Female | Log-linear | lag0-1 | 0.00050* | 0.00046 |
| Liu et al. (2021) | 4 Cities, China | 2014 - 2017 | 0-74y | Male | Log-linear | lag0-3 | 0.00069* | 0.00014 |
|  | 4 Cities, China | 2014 - 2017 | ≥75y | Female | Log-linear | lag0-3 | 0.00076* | 0.00016 |
|  | 4 cities, China: Urban areas | 2014 - 2017 | 0-74y | Male | Log-linear | lag0-3 | 0.00078* | 0.00018 |
|  | 4 cities, China: Urban areas | 2014 - 2017 | ≥75y | Female | Log-linear | lag0-3 | 0.00080* | 0.00020 |
|  | 4 cities, China: Rural areas | 2014 - 2017 | 0-74y | Male | Log-linear | lag0-3 | 0.00055* | 0.00024 |
|  | 4 cities, China: Rural areas | 2014 - 2017 | ≥75y | Female | Log-linear | lag0-3 | 0.00068* | 0.00029 |
| Shin et al. (2022) | 24 cities, Canada | 2001 - 2012 | ≥1y | Male | Log-linear | lag0 | 0.00188* | 0.00070 |
|  | 24 cities, Canada | 2001 - 2012 | ≥1y | Female | Log-linear | lag1 | 0.00060 | 0.00071 |
|  | 24 cities, Canada: Warm season | 2001 - 2012 | ≥1y | Male | Log-linear | lag1 | 0.00188 | 0.00123 |
|  | 24 cities, Canada: Warm season | 2001 - 2012 | ≥1y | Female | Log-linear | lag1 | -0.00020 | 0.00123 |
|  | 24 cities, Canada: Cold season | 2001 - 2012 | ≥1y | Male | Log-linear | lag0 | 0.00237 | 0.00167 |
|  | 24 cities, Canada: Cold season | 2001 - 2012 | ≥1y | Female | Log-linear | lag1 | 0.00109 | 0.00133 |
| Note: *β is significant at *p*-value < 0.05. | | | | | | | | |

**Table S12** Association between cardiovascular morbidity and ambient PM2.5 exposure in Ratchaburi during 2015–2019.

| **Lag** | **Parameter** | **All-age and  All-gender** | **Age group** | | | **Gender group** | |
| --- | --- | --- | --- | --- | --- | --- | --- |
| **Children** | **Adult** | **Elderly** | **Male** | **Female** |
| 0 | β | 0.00064 | 0.00114 | 0.00077 | 0.00055 | 0.00057 | 0.00070 |
| SE | 0.00093 | 0.00236 | 0.00094 | 0.00095 | 0.00093 | 0.00095 |
| -value | 0.50046 | 0.64040 | 0.42053 | 0.57492 | 0.55388 | 0.47198 |
| 1 | β | 0.00064 | -0.00028 | 0.00085 | 0.00051 | 0.00050 | 0.00073 |
| SE | 0.00071 | 0.00167 | 0.00073 | 0.00074 | 0.00073 | 0.00074 |
| -value | 0.37859 | 0.87588 | 0.24626 | 0.49943 | 0.50209 | 0.32858 |
| 2 | β | -0.00030 | -0.00086 | -0.00030 | -0.00030 | -0.00037 | -0.00026 |
| Std E | 0.00050 | 0.00120 | 0.00051 | 0.00052 | 0.00051 | 0.00052 |
| -value | 0.56055 | 0.48074 | 0.56468 | 0.57273 | 0.47626 | 0.62694 |
| 3 | β | -0.00080 | -0.00110 | -0.00097 | -0.00069 | -0.00078 | -0.00082 |
| SE | 0.00052 | 0.00119 | 0.00052 | 0.00053 | 0.00052 | 0.00053 |
| -value | 0.12018 | 0.36474 | 0.06192 | 0.19417 | 0.13370 | 0.12016 |
| 4 | β | -0.00034 | -0.00118 | -0.00049 | -0.00024 | -0.00029 | -0.00037 |
| SE | 0.00050 | 0.00119 | 0.00051 | 0.00051 | 0.00051 | 0.00051 |
| -value | 0.50514 | 0.32964 | 0.33590 | 0.65304 | 0.57820 | 0.48083 |
| 5 | β | 0.00075 | -0.00095 | 0.00079 | 0.00073 | 0.00077 | 0.00074 |
| SE | 0.00048 | 0.00095 | 0.00049 | 0.00049 | 0.00048 | 0.00049 |
| -value | 0.11839 | 0.31980 | 0.10522 | 0.13899 | 0.11254 | 0.13360 |
| 6 | β | 0.00125 | 0.00002 | 0.00147* | 0.00112 | 0.00125 | 0.00125 |
| SE | 0.00072 | 0.00150 | 0.00073 | 0.00074 | 0.00073 | 0.00074 |
| -value | 0.08188 | 0.99041 | 0.04423 | 0.12854 | 0.08511 | 0.09062 |
| 7 | β | -0.00089 | 0.00251 | -0.00084 | -0.00092 | -0.00076 | -0.00098 |
| SE | 0.00088 | 0.00177 | 0.00089 | 0.00090 | 0.00089 | 0.00090 |
| -value | 0.31288 | 0.15782 | 0.35027 | 0.30799 | 0.39804 | 0.27678 |
| 0-1 | β | 0.00128 | 0.00027 | 0.00161* | 0.00105 | 0.00105 | 0.00143 |
| SE | 0.00078 | 0.00209 | 0.00079 | 0.00080 | 0.00079 | 0.00080 |
| -value | 0.10042 | 0.90538 | 0.04177 | 0.18876 | 0.18306 | 0.07342 |
| 0-2 | β | 0.00098 | 0.00202 | 0.00130 | 0.00076 | 0.00069 | 0.00116 |
| SE | 0.00080 | 0.00221 | 0.00081 | 0.00082 | 0.00081 | 0.00082 |
| -value | 0.22385 | 0.36623 | 0.10827 | 0.36197 | 0.40357 | 0.15629 |
| 0-3 | β | 0.00017 | 0.00305 | 0.00033 | 0.00006 | -0.00009 | 0.00034 |
| SE | 0.00080 | 0.00217 | 0.00081 | 0.00082 | 0.00081 | 0.00082 |
| -value | 0.84224 | 0.15943 | 0.69775 | 0.94668 | 0.91860 | 0.69249 |
| 0-4 | β | -0.00017 | 0.00308 | -0.00016 | -0.00018 | -0.00038 | -0.00003 |
| SE | 0.00094 | 0.00263 | 0.00095 | 0.00096 | 0.00094 | 0.00096 |
| -value | 0.86570 | 0.24438 | 0.87547 | 0.86113 | 0.70016 | 0.97743 |
| 0-5 | β | 0.00058 | 0.00227 | 0.00063 | 0.00056 | 0.00039 | 0.00071 |
| SE | 0.00093 | 0.00274 | 0.00094 | 0.00095 | 0.00094 | 0.00095 |
| -value | 0.54432 | 0.41401 | 0.51583 | 0.56877 | 0.69200 | 0.46787 |
| 0-6 | β | 0.00183 | 0.00101 | 0.00210 | 0.00168 | 0.00165 | 0.00196 |
| SE | 0.00106 | 0.00312 | 0.00107 | 0.00108 | 0.00107 | 0.00109 |
| -value | 0.08250 | 0.75822 | 0.05043 | 0.12200 | 0.12442 | 0.07052 |
| 0-7 | β | 0.00094 | -0.00038 | 0.00125 | 0.00075 | 0.00089 | 0.00098 |
| SE | 0.00097 | 0.00267 | 0.00098 | 0.00099 | 0.00098 | 0.00100 |
| -value | 0.33895 | 0.89509 | 0.20402 | 0.46160 | 0.37269 | 0.33222 |
| Note: *β is significant at *p*-value < 0.05. | | | | | | | |

**Table S13** Comparison of the relationship between cardiovascular morbidity and ambient PM2.5 exposure across age groups (all genders) in this study versus other studies.

| **Ref.** | **City, Country** | **Duration** | **Incidence** | **Age** | **Gender** | **Form** | **Highest lag** | **Β** | **Std E** |
| --- | --- | --- | --- | --- | --- | --- | --- | --- | --- |
| *This study* | *Ratchaburi, Thailand* | *2015 – 2019* | *Hospital outpatient visits* | *Children (0-14y)* | *All* | *Log-linear* | *lag0-4* | *0.00308* | *0.00263* |
| *This study* | *Ratchaburi, Thailand* | *2015 – 2019* | *Hospital outpatient visits* | *Adult (15-59y)* | *All* | *Log-linear* | *lag0-1* | *0.00161** | *0.00079* |
| *This study* | *Ratchaburi, Thailand* | *2015 – 2019* | *Hospital outpatient visits* | *Elderly (*≥*60y)* | *All* | *Log-linear* | *lag0-6* | *0.00168* | *0.00108* |
| Su et al. (2016) | Beijing, China | 2007 - 2018 | Emergency room visits | <45y | All | Log-linear | lag0-7 | 0.00051* | 0.00163 |
|  | Beijing, China | 2007 - 2018 | Emergency room visits | 45-74y | All | Log-linear | lag0-7 | 0.00098* | 0.00272 |
|  | Beijing, China | 2007 - 2018 | Emergency room visits | ≥75y | All | Log-linear | lag7 | 0.00093* | 0.00263 |
| Gu et al. (2020) | 252 cities, China | 2013 - 2017 | Hospital admission | <65y | All | Log-linear | lag0 | 0.00022* | 0.00003 |
|  | 252 cities, China | 2013 - 2017 | Hospital admission | 65-74y | All | Log-linear | lag0 | 0.00028* | 0.00004 |
|  | 252 cities, China | 2013 - 2017 | Hospital admission | ≥75y | All | Log-linear | lag0 | 0.00036* | 0.00005 |
| Wang et al. (2020) | Wuhan, China | 2015 - 2017 | Hospital Admissions | 0-64y | All | Log-linear | lag7 | 0.00104* | 0.00026 |
|  | Wuhan, China | 2015 - 2017 | Hospital Admissions | ≥65y | All | Log-linear | lag7 | 0.00097* | 0.00022 |
| Wu et al. (2022) | Lanzhou, China | 2014 - 2019 | Hospital Admissions | <65 | All | Log-linear | lag0-1 | 0.00050 | 0.00053 |
|  | Lanzhou, China | 2014 - 2019 | Hospital Admissions | ≥65y | All | Log-linear | lag0-1 | 0.00149* | 0.00050 |
| Wang et al. (2023) | Wuhan, China | 2017 - 2019 | Hospital admission | <65y | All | Log-linear | lag0-1 | 0.00138* | 0.00047 |
|  | Wuhan, China | 2017 - 2019 | Hospital admission | 65-74y | All | Log-linear | lag0-1 | 0.00161* | 0.00042 |
|  | Wuhan, China | 2017 - 2019 | Hospital admission | ≥75y | All | Log-linear | lag0-1 | 0.00119* | 0.00032 |
| Note: *β is significant at *p*-value < 0.05. | | | | | | | | | |

**Table S14** Comparison of the relationship between cardiovascular morbidity and ambient PM2.5 exposure by gender category (all age groups) in this study versus other studies.

| **Ref.** | **City, Country** | **Duration** | **Incidence** | **Age** | **Gender** | **Form** | **Highest lag** | **Β** | **Std E** |
| --- | --- | --- | --- | --- | --- | --- | --- | --- | --- |
| *This study* | *Ratchaburi, Thailand* | *2015 - 2019* | *Hospital outpatient visits* | *All* | *Male* | *Log-linear* | *lag0-6* | *0.00165* | *0.00107* |
| *This study* | *Ratchaburi, Thailand* | *2015 - 2019* | *Hospital outpatient visits* | *All* | *Female* | *Log-linear* | *lag0-6* | *0.00196* | *0.00109* |
| Su et al. (2016) | Beijing, China | 2007 - 2018 | Emergency room visits | All | Male | Log-linear | lag0-7 | 0.00123* | 0.00333 |
|  | Beijing, China | 2007 - 2018 | Emergency room visits | All | Female | Log-linear | lag7 | 0.00015* | 0.00023 |
| Gu et al., (2020) | 252 cities, China | 2013 - 2017 | Hospital admission | <65y | All | Log-linear | lag0 | 0.00028* | 0.00003 |
|  | 252 cities, China | 2013 - 2017 | Hospital admission | 65-74y | All | Log-linear | lag0 | 0.00026* | 0.00004 |
| Wang et al. (2020) | Wuhan, China | 2015 - 2017 | Hospital Admissions | All | Male | Log-linear | lag7 | 0.00100* | 0.00023 |
|  | Wuhan, China | 2015 - 2017 | Hospital Admissions | All | Female | Log-linear | lag7 | 0.00100* | 0.00026 |
| Shin et al. (2022) | 24 cities, Canada | 2001 - 2012 | Hospitalization | ≥1y | Male | Log-linear | lag3 | -0.00050 | 0.00056 |
|  | 24 cities, Canada | 2001 - 2012 | Hospitalization | ≥1y | Female | Log-linear | lag2 | 0.00020 | 0.00061 |
|  | 24 cities, Canada: Warm season | 2001 - 2012 | Hospitalization | ≥1y | Male | Log-linear | lag2 | -0.00060 | 0.00059 |
|  | 24 cities, Canada: Warm season | 2001 - 2012 | Hospitalization | ≥1y | Female | Log-linear | lag3 | 0.00070 | 0.00076 |
|  | 24 cities, Canada: Cold season | 2001 - 2012 | Hospitalization | ≥1y | Male | Log-linear | lag1 | 0.00040 | 0.00109 |
|  | 24 cities, Canada: Cold season | 2001 - 2012 | Hospitalization | ≥1y | Female | Log-linear | lag1 | 0.00149* | 0.00070 |
| Wu et al. (2022) | Lanzhou, China | 2014 - 2019 | Hospital Admissions | All | Male | Log-linear | lag0-1 | 0.00159* | 0.00053 |
|  | Lanzhou, China | 2014 - 2019 | Hospital Admissions | All | Female | Log-linear | lag0-1 | 0.00070 | 0.00051 |
| Wang et al. (2023) | Wuhan, China | 2017 - 2019 | Hospital admission | All | Male | Log-linear | lag0-1 | 0.00133* | 0.00039 |
|  | Wuhan, China | 2017 - 2019 | Hospital admission | All | Female | Log-linear | lag0-1 | 0.00145* | 0.00040 |
| Note: *β is significant at *p*-value < 0.05. | | | | | | | | | |

**
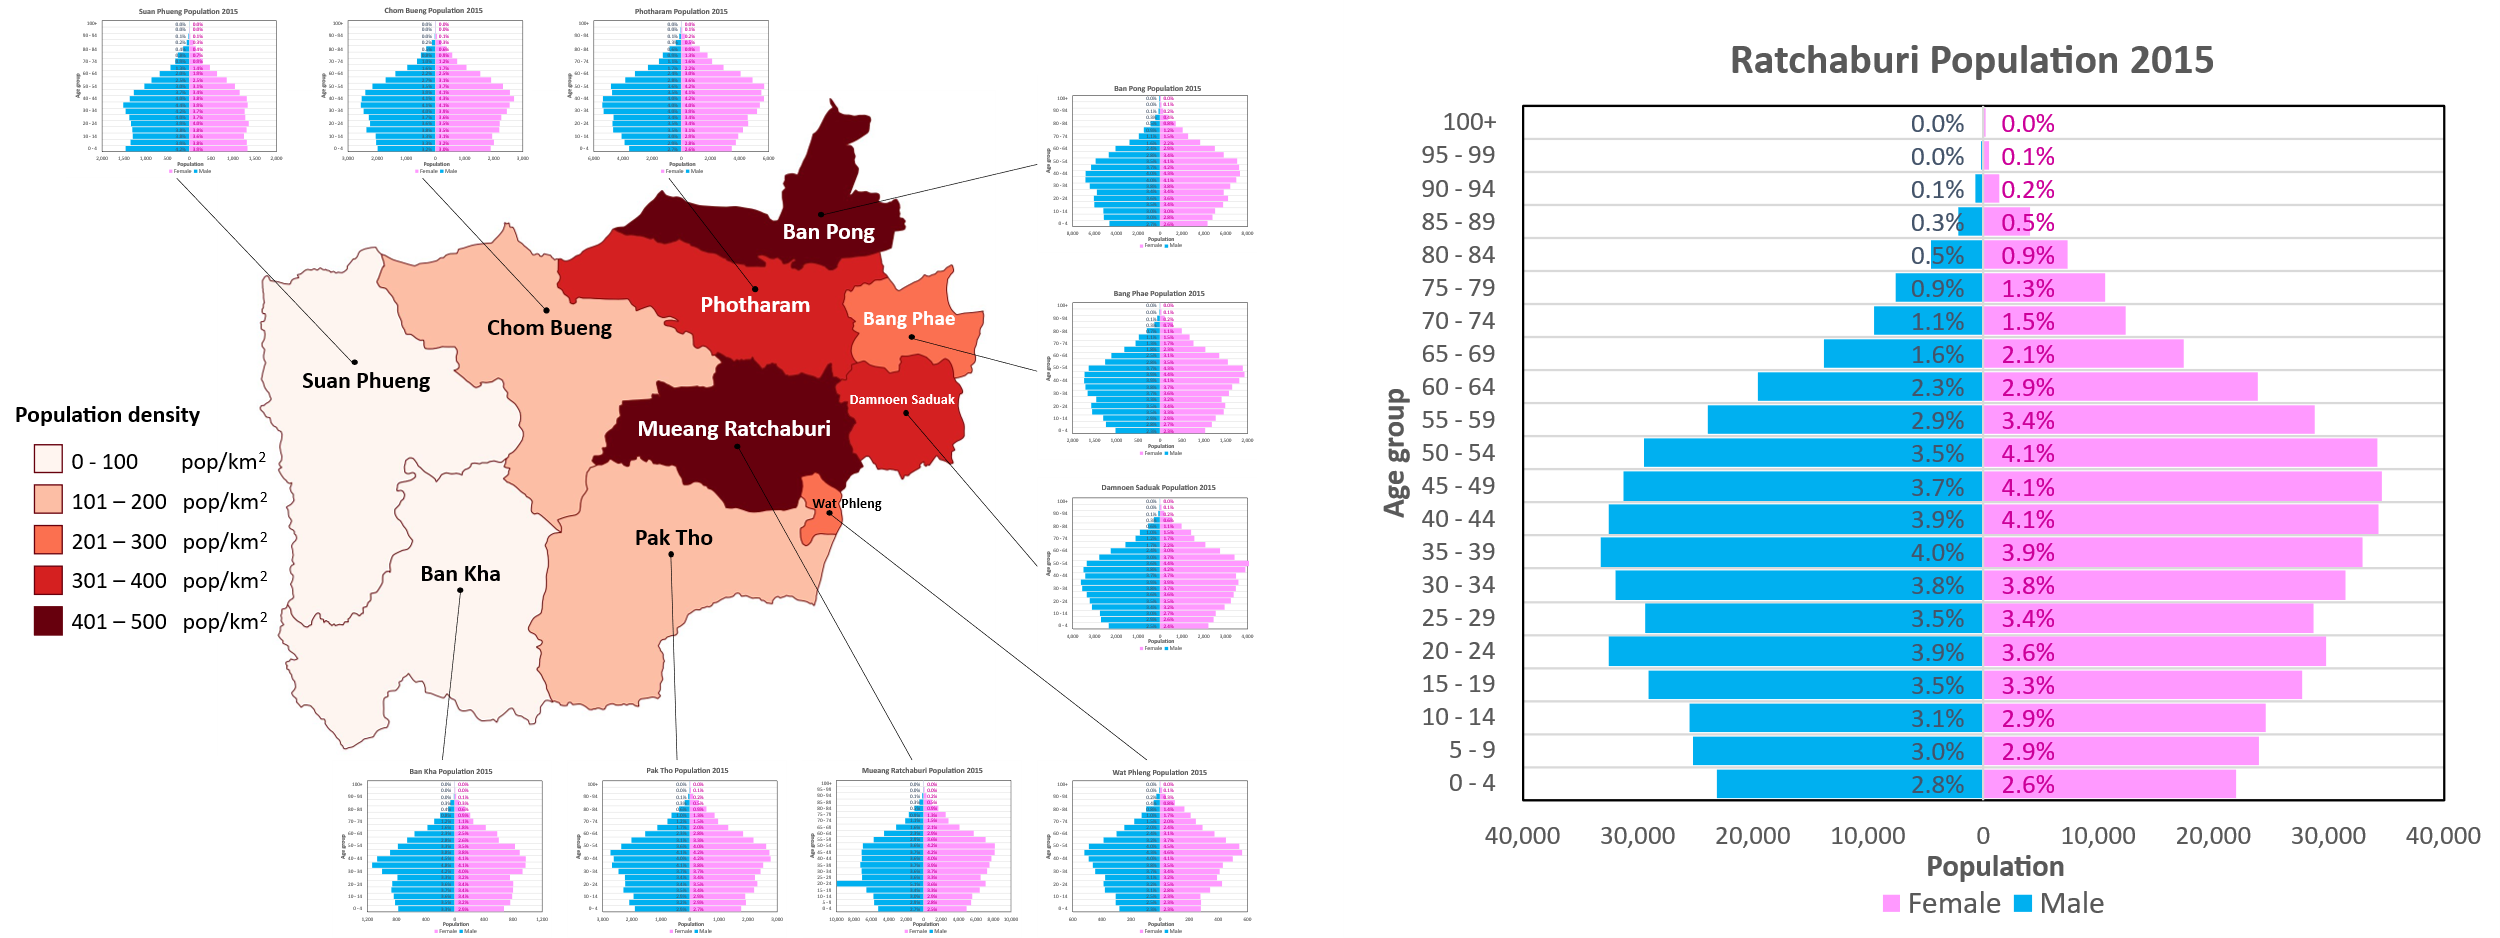
**

**Fig. S1** Annual average population pyramid and population density in Ratchaburi in 2015.

**
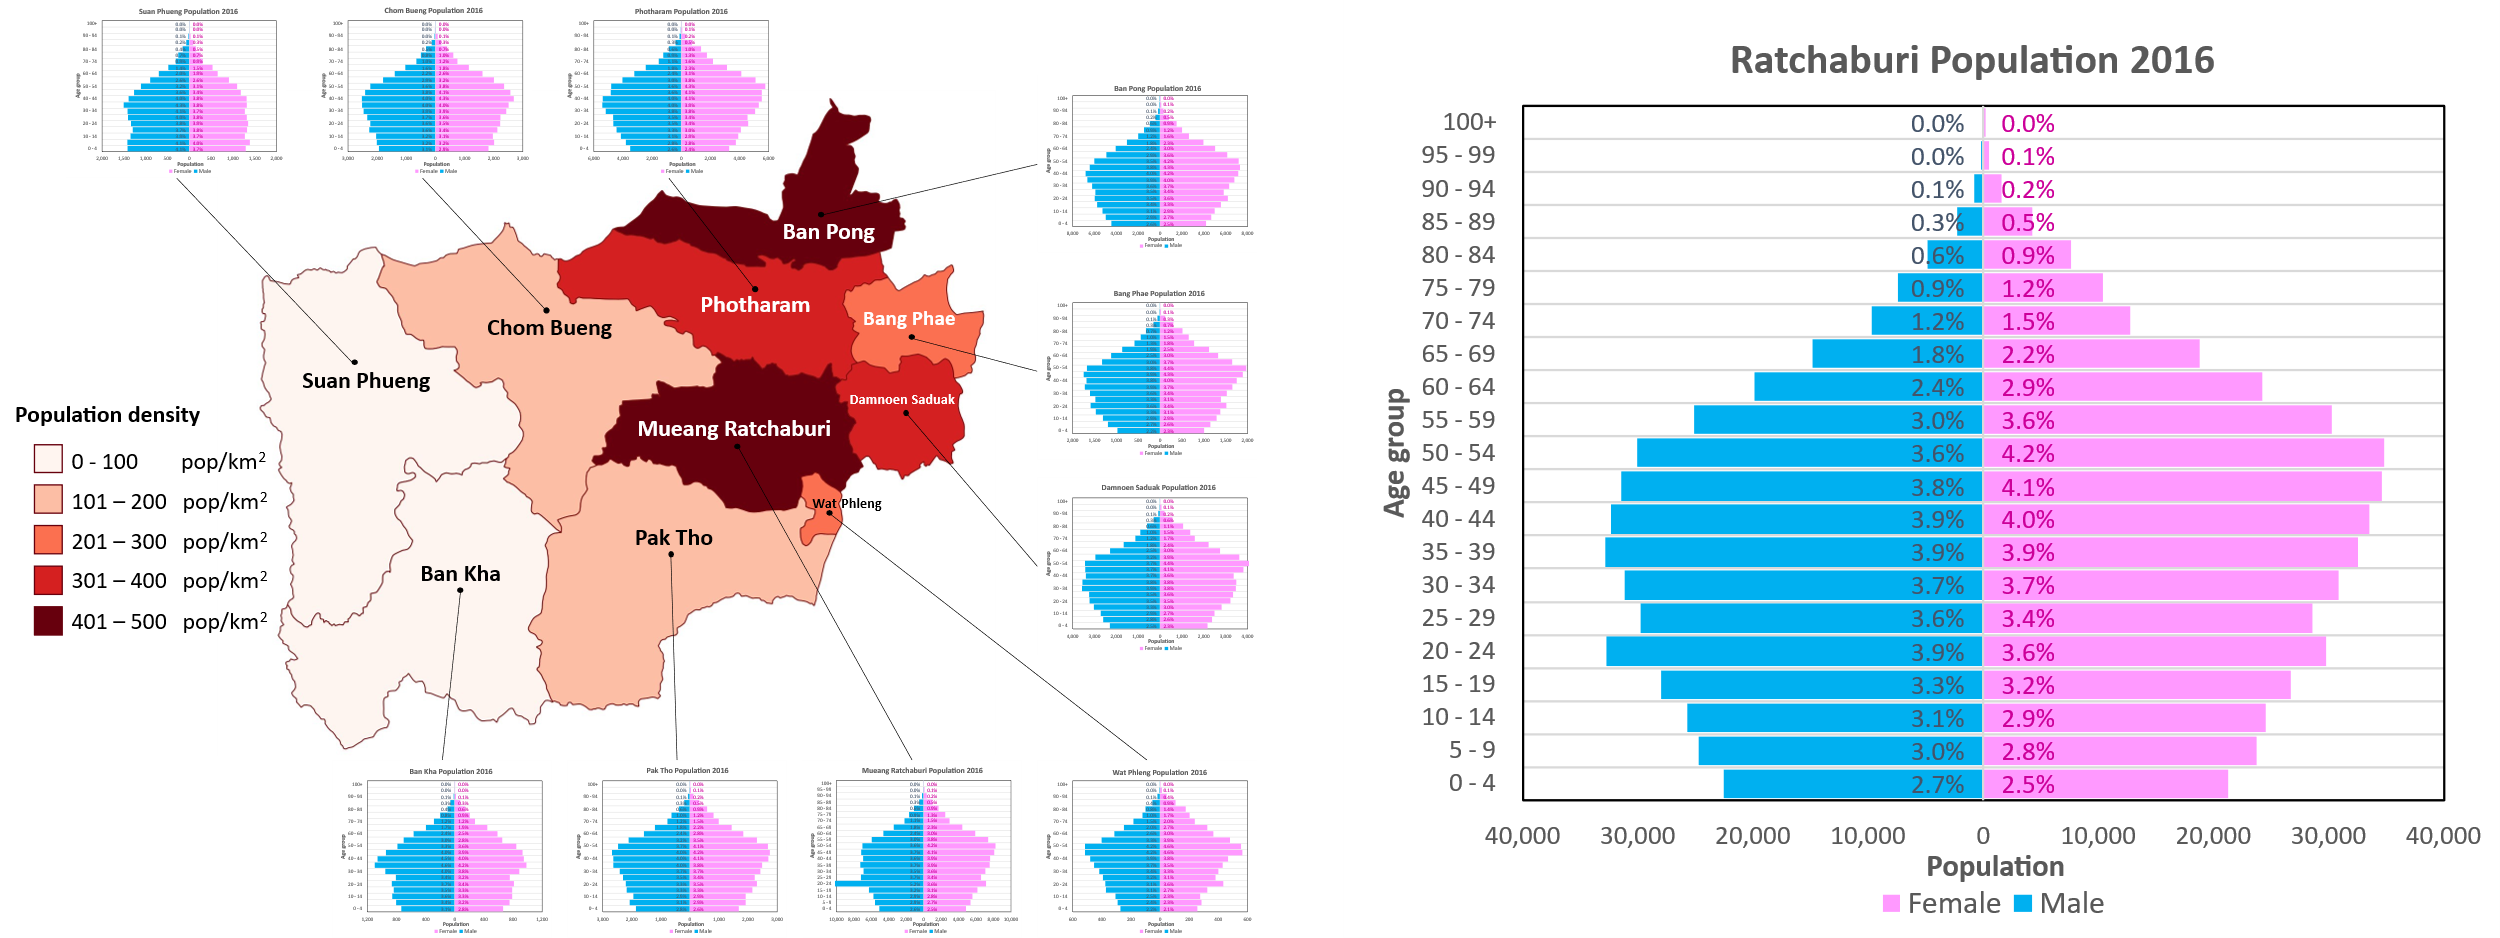
**

**Fig. S2** Annual average population pyramid and population density in Ratchaburi in 2016.

**
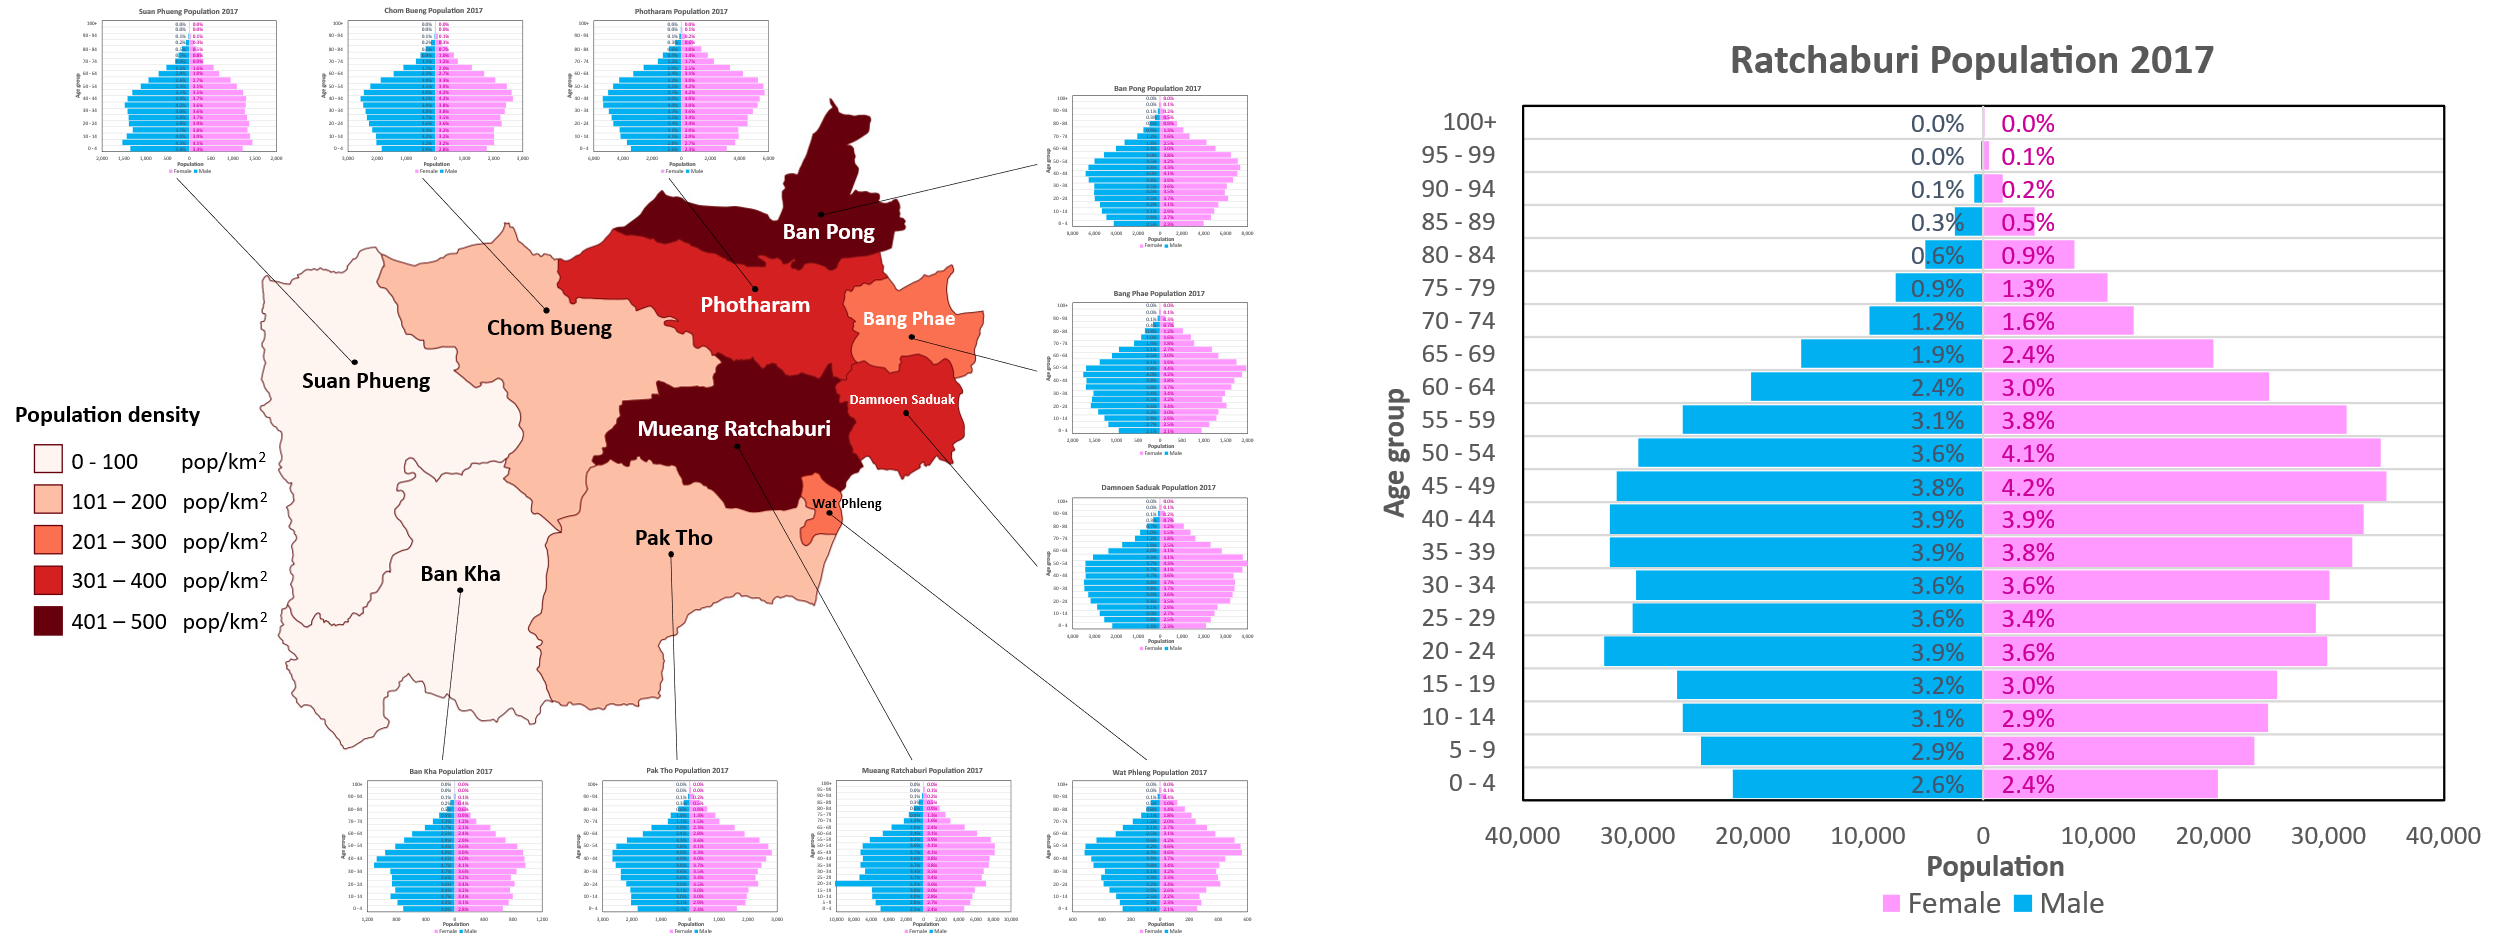
Fig. S3** Annual average population pyramid and population density in Ratchaburi in 2017.

**
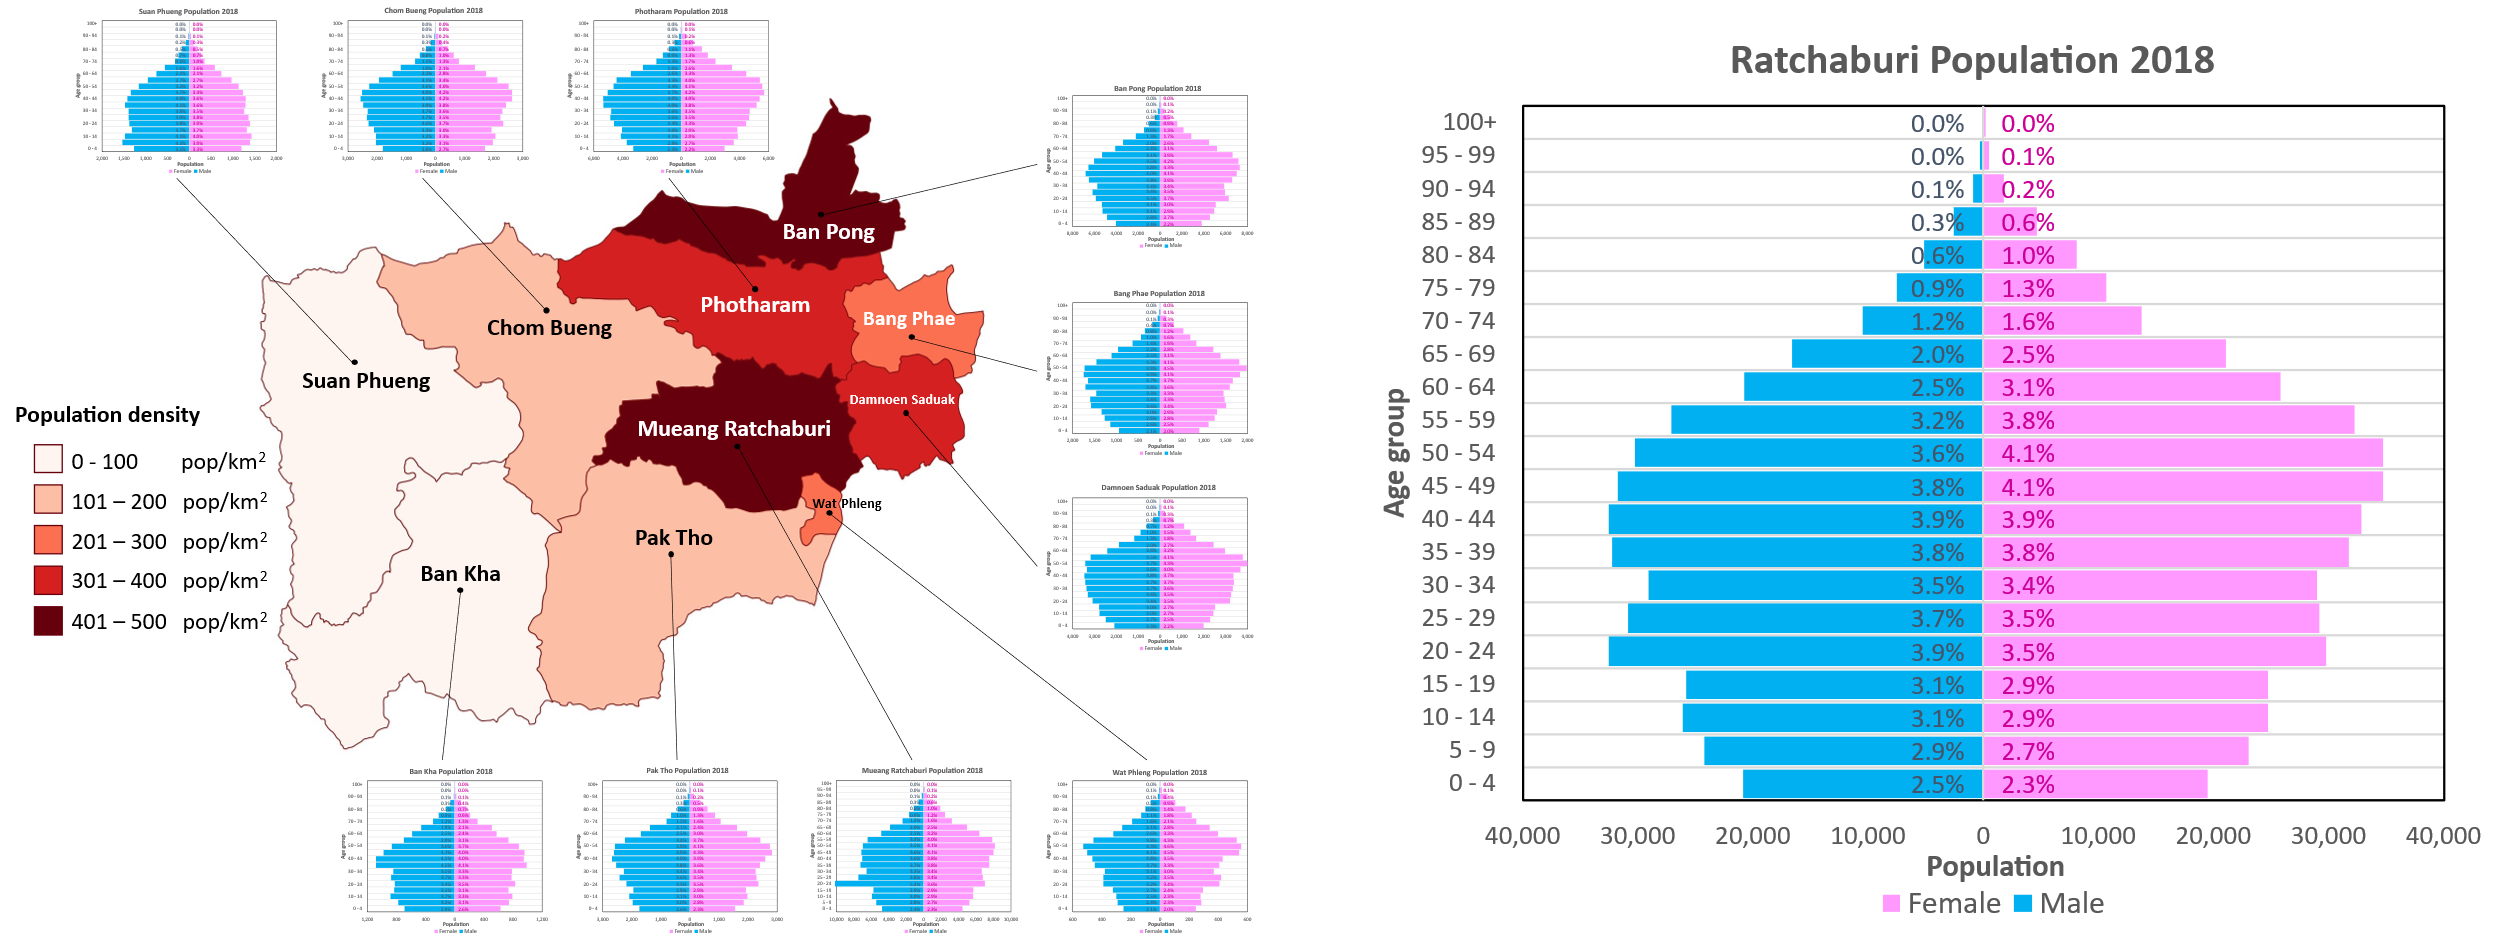
**

**Fig. S4** Annual average population pyramid and population density in Ratchaburi in 2018.


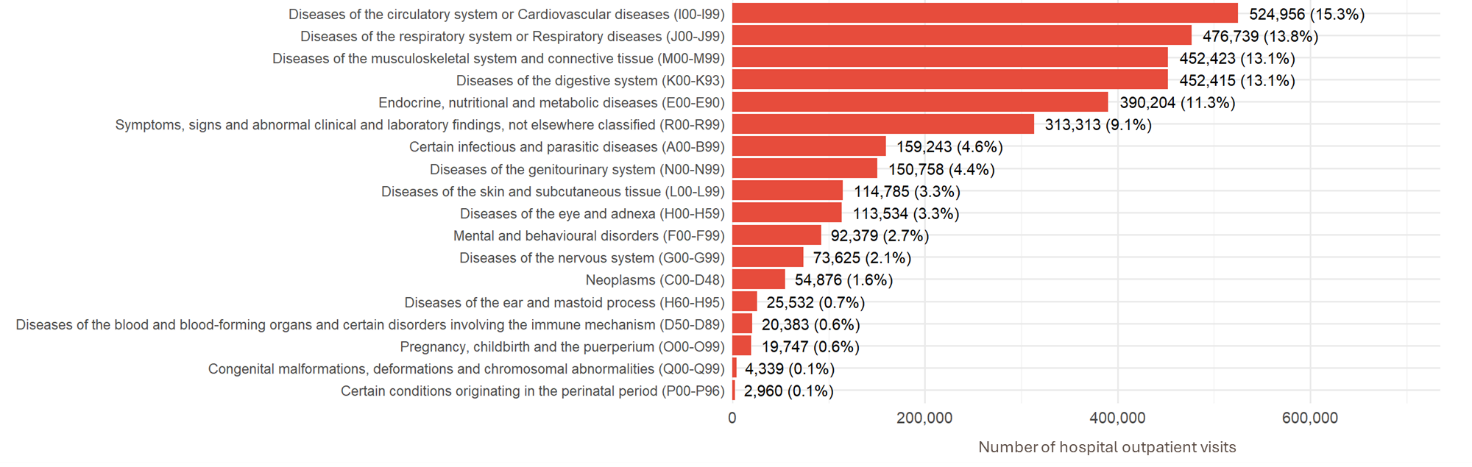


**Fig. S5** Proportion of hospital outpatient visits for non-accidental morbidity (ICD-10: A00–R99) by sub-cause in Ratchaburi during 2015–2019.

**References**

Chen C, Zhu P, Lan L et al (2018) Short-term exposures to PM2.5 and cause-specific mortality of cardiovascular health in China. Environ Res 161: 188-194. https://doi.org/10.1016/j.envres.2017.10.046

Cheng H, Zhu F, Lei R et al (2019) Associations of ambient PM2.5 and O3 with cardiovascular mortality: a time-series study in Hefei, China. Int J Biometeorol 63: 1437-1447. https://doi.org/10.1007/s00484-019-01766-2

Gong T, Sun Z, Zhang X et al (2019) Associations of black carbon and PM2.5 with daily cardiovascular mortality in Beijing, China. Atmos Environ 214: 116876. https://doi.org/10.1016/j.atmosenv.2019.116876

Gu J, Shi Y, Zhu Y, Chen N, Wang H, Zhang Z, Chen T (2020) Ambient air pollution and cause-specific risk of hospital admission in China: A nationwide time-series study. PLoS Med 17(8): e1003188. https://doi.org/10.1371/journal.pmed.1003188

Li D, Wang JB, Zhang ZY et al (2018) Association between short-term exposure to ambient air pollution and daily mortality: a time-series study in Eastern China. Environ Sci Pollut Res 25: 16135-16143. https://doi.org/10.1007/s11356-018-1759-y

Liu T, Meng H, Yu M et al (2021) Urban-rural disparity of the short-term association of PM2.5 with mortality and its attributable burden. The Innovation, 2(4): 100171. https://doi.org/10.1016/j.xinn.2021.100171

Office of Permanent Secretary (OPM), Ministry of Public Health (2016) Public health statistics A.D.2015. Nonthaburi

Office of Permanent Secretary (OPM), Ministry of Public Health (2017) Public health statistics A.D.2016. Nonthaburi

Office of Permanent Secretary (OPM), Ministry of Public Health (2018) Public health statistics A.D.2017. Nonthaburi

Office of Permanent Secretary (OPM), Ministry of Public Health (2019) Public health statistics A.D.2018. Nonthaburi

Office of Permanent Secretary (OPM), Ministry of Public (Health 2020) Public health statistics A.D.2019. Nonthaburi

Pengjan S, Bonnet S, Garivait S. (2026). Cardiovascular and Respiratory Mortality from Ambient PM2.5 and Health Benefit Assessment: A Case Study from Ratchaburi, Thailand. Environments, 13 (3), 139. https://doi.org/https://doi.org/10.3390/environments13030139

Priyankara S, Senarathna M, Jayaratne R (2021) Ambient PM2.5 and PM10 Exposure and Respiratory Disease Hospitalization in Kandy, Sri Lanka. Int J Environ Res Public Health, 18(18): 9617. https://doi.org/10.3390/ijerph18189617

Ratchaburi Provincial Public Health Office (RBPHO), Ministry of Public Health (2020) General Information of Ratchaburi. from http://rbpho.moph.go.th/upload-file/doc/files/11032020-093141-5931.pdf. Accessed 14 September 2020

Ratchaburi Provincial Public Health Office (RBPHO), Ministry of Public Health (2021) 2020 Annual Report. https://anyflip.com/bookcase/urqfe. Accessed 07 December 2021

Shin HH, Maquiling A, Thomson EM, Park IW, Stieb DM, Dehghani P (2022) Sex-difference in air pollution-related acute circulatory and respiratory mortality and hospitalization. Sci Total Environ 806: 150515. https://doi.org/10.1016/j.scitotenv.2021.150515

Strosnider HM, Chang HH, Darrow, LA, Liu Y, Vaidyanathan A, Strickland MJ (2019) Age-specific associations of ozone and fine particulate matter with respiratory emergency department visits in the United States. Am J Respir Crit Care Med 199(7): 882-890. https://doi.org/10.1164/rccm.201806-1147OC

Su C, Breitner S, Schneider A, Liu L, Franck U, Peters A, Pan X (2016) Short-term effects of fine particulate air pollution on cardiovascular hospital emergency room visits: a time-series study in Beijing, China. Int Arch Occup Environ Health 89(4): 641-657. https://doi.org/10.1007/s00420-015-1102-6

Wang J, Huang Z, Liu X et al (2023) Effects of ambient air pollution on cause-specific hospitalizations in Wuhan during 2017–2019. Ecotoxicol Environ Saf 253: 114686. https://doi.org/10.1016/j.ecoenv.2023.114686

Wang X, Yu C, Zhang Y, Shi F, Meng R, Yu Y (2020) Attributable risk and economic cost of cardiovascular hospital admissions due to ambient particulate matter in Wuhan, China. Int J Environ Res Public Health 17(15): 5453. https://doi.org/10.3390/ijerph17155453

Wu T, Yang X, Chu A, Xie X, Bai M, Peng Y, Zhang Z (2022) Acute effects of fine particulate matter (PM2.5) on hospital admissions for cardiovascular diseases in Lanzhou, China: A time-series study. Environ Sci Eur 34(1): 1-14. https://doi.org/10.1186/s12302-022-00634-y

Yap J, Ng Y, Yeo KK, Sahlén A, Lam CSP, Lee V, Ma S (2019) Particulate air pollution on cardiovascular mortality in the tropics: impact on the elderly. Environ Health 18(1): 1-9. https://doi.org/10.1186/s12940-019-0476-4
